# Supplementary material for: Proteinaceous secretion of bioadhesive produced during crawling and settlement of Crassostrea gigas larvae
Source: PubMed Central journal article supplement (PMC6193008; doi:10.1038/s41598-018-33720-4), 2018-10-17
Supplement: 41598_2018_33720_MOESM2_ESM.pdf [file 41598_2018_33720_MOESM2_ESM.pdf]

Proteinaceous secretion of bioadhesive produced during crawling and settlement of *Crassostrea gigas* larvae.

Valentin Foulon\*<sup>1</sup>, Sébastien Artigaud<sup>1</sup>, Manon Buscaglia<sup>1</sup>, Benoit Bernay<sup>2</sup>, Caroline Fabioux<sup>1</sup>, Bruno Petton<sup>3</sup>, Philippe Elies<sup>4</sup>, Kada Boukerma<sup>5</sup>, Claire Hellio<sup>1</sup>, Fabienne Guérard<sup>1</sup>, Pierre Boudry<sup>3</sup>.

<sup>1</sup>Laboratoire des Sciences de l'Environnement Marin (LEMAR), UMR 6539 CNRS/UBO/IRD/Ifremer, Institut Universitaire Européen de la Mer, Technopole Brest-Iroise, Rue Dumont d'Urville, 29280 Plouzané, France

<sup>2</sup> Plateforme Proteogen SF ICORE, Université de Caen Basse-Normandie, 14032 Caen Cedex, France

<sup>3</sup> Ifremer, Laboratoire des Sciences de l'Environnement Marin, UMR 6539 CNRS/UBO/IRD/Ifremer, Centre Bretagne, 29280 Plouzané, France

<sup>4</sup> Plateforme d'Imagerie et de Mesures en Microscopie, Université de Bretagne Occidentale, 29200 Brest, France

<sup>5</sup> Ifremer, Laboratoire Détection, Capteurs et Mesures (LDCM), Centre Bretagne, 29280 Plouzané, France

\*Correspondence to [valentin.foulon@univ-brest.fr](mailto:valentin.foulon@univ-brest.fr)

Supplementary Note 1. Protein extraction buffer tested in 1000 adhesive footprint of *Crassostrea gigas* larvae (n=5). For all buffers, after extraction, and sample concentration, no proteins were detected by Bradford assay, and no macroscopically changes in binocular observation were present. These methods were not retained for proteomic approach.

|                       |                                                                                   |                                                                                                                                          |                                                                                                                                                                             |                                                                                                                                                                     |                                                                                                                                                                                                                   |
|-----------------------|-----------------------------------------------------------------------------------|------------------------------------------------------------------------------------------------------------------------------------------|-----------------------------------------------------------------------------------------------------------------------------------------------------------------------------|---------------------------------------------------------------------------------------------------------------------------------------------------------------------|-------------------------------------------------------------------------------------------------------------------------------------------------------------------------------------------------------------------|
| Extraction Buffer     | Urea 8M<br>SDS 2%<br>Triton x-100 2%<br>CHAPS 2%                                  | NaOH 0,1 M<br>EDTA 0,05 M<br>SDS 2%<br>$\beta$ -mercaptoethanol 2%                                                                       | Tris-HCl 1,5 M<br>pH 8,5<br>Guanidine hydrochloride 6M<br>EDTA 0,02M<br>DTT 0,5 M                                                                                           | Guanidine hydrochloride 2 M<br>Hydroxylamine hydrochloride 2M<br>K <sub>2</sub> CO <sub>3</sub> 0,2 M<br>pH 9                                                       | Tris-HCl 0,6M<br>pH 6,8<br>SDS 2%<br>DTT 0,5M                                                                                                                                                                     |
| Extraction condition  | 1h 60°C                                                                           | 30min 90°C                                                                                                                               | 1h 60°C                                                                                                                                                                     | 4h 45°C                                                                                                                                                             | 3h 60°C                                                                                                                                                                                                           |
| Binocular observation | 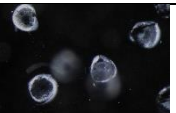 |                                                         |                                                                                            |                                                                                   |                                                                                                                                |
| Reference             | Homelab protocol                                                                  | Von Der Haar T. <i>et al.</i> Optimized protein extraction for quantitative proteomics of yeasts. <i>PloS one</i> , 2(10), e1078 (2007). | Kamino K. <i>et al.</i> Barnacle cement proteins importance of disulfide bonds in their insolubility. <i>Journal of Biological Chemistry</i> , 275(35), 27360-27365 (2000). | Tan YP. <i>et al.</i> Infiltration of chitin by protein coacervates defines the squid beak mechanical gradient. <i>Nature chemical biology</i> , 11(7), 488 (2015). | Santos R. <i>et al.</i> First insights into the biochemistry of tube foot adhesive from the sea urchin <i>Paracentrotus lividus</i> (Echinoidea, Echinodermata). <i>Marine biotechnology</i> , 11(6), 686 (2009). |

Supplementary Table 1. Protein list detected in adhesive footprint of *Crassostrea gigas* larvae. For each sequence, Gene Ontology for molecular function (GO F), cellular component (GO C), and biological process (GO P) were annotated. Gene expression (RPKM) by stage was represented with data from Zhang et al. 2012. Larval stage: Eggs (E), Cleavage (C), Embryo (Em), Trochophore (T), D-shape larvae (D), Umbo (U), Pediveliger (P). Spat (S). Juvenile (J). Adult (Ad). For adult stage, 11 different organs were represented from the left to the right: outer mantle margin, inner mantle margin, digestive gland, female gonad, gill, adductor muscle, hemolymph, labial palp, remaining tissues, female gonad, and male gonad.

| Gene ID      | Protein name                             | GO F                                                                                     | GO C                                         | GO P                                                                                                                                                                                                            | Gene expression (RPKM) profile by stage (E-U: Eggs to larvae, P: pediveliger, S-J: after metamorphosis, Ad: Adult) |
|--------------|------------------------------------------|------------------------------------------------------------------------------------------|----------------------------------------------|-----------------------------------------------------------------------------------------------------------------------------------------------------------------------------------------------------------------|--------------------------------------------------------------------------------------------------------------------|
| CGI_10017112 | Actin                                    | ATP binding; structural constituent of cytoskeleton                                      | striated muscle thin filament; membrane raft | hermaphrodite genitalia development; nematode larval development; embryo development ending in birth or egg hatching; apoptotic process; cytokinesis; actin cytoskeleton organization; inductive cell migration |                                                                                                                    |
| CGI_10003110 | Actin alpha - sarcomeric-like isoform X1 | actin filament binding; calcium ion binding                                              |                                              | actin crosslink formation; actin filament bundle assembly                                                                                                                                                       |                                                                                                                    |
| CGI_10003491 | Actin A3a cytoplasmic                    | ATP binding                                                                              |                                              |                                                                                                                                                                                                                 |                                                                                                                    |
| CGI_10018876 | Actin adductor muscle                    | ATP binding                                                                              | cytoskeleton; cytoplasm                      |                                                                                                                                                                                                                 |                                                                                                                    |
| CGI_10024887 | Dynein heavy chain axonemal              | ATPase activity; ATP binding; microtubule motor activity; actin binding; kinase activity | dynein complex                               | phosphorylation; microtubule-based movement                                                                                                                                                                     |                                                                                                                    |

|              |                                                       |                                                                         |                                |                                                                                                                                |  |
|--------------|-------------------------------------------------------|-------------------------------------------------------------------------|--------------------------------|--------------------------------------------------------------------------------------------------------------------------------|--|
| CGI_10005339 | echinoderm microtubule-associated - like 2 isoform X3 | microtubule binding                                                     | integral component of membrane | regulation of microtubule nucleation; negative regulation of microtubule polymerization                                        |  |
| CGI_10003521 | filamin-A-like isoform X1                             | actin filament binding                                                  |                                |                                                                                                                                |  |
| CGI_10012231 | filamin-A-like isoform X4                             | actin filament binding                                                  |                                |                                                                                                                                |  |
| CGI_10002689 | gelsolin 2                                            | actin binding; calcium ion binding                                      |                                | actin filament severing; actin filament capping; actin nucleation; actin filament polymerization; actin filament fragmentation |  |
| CGI_10010873 | Intermediate filament                                 | structural molecule activity                                            | intermediate filament          |                                                                                                                                |  |
| CGI_10022093 | Myosin                                                | actin filament binding; ATP binding; calmodulin binding; motor activity | myosin filament; myofibril     | metabolic process                                                                                                              |  |
| CGI_10025109 | Myosin                                                | ATP binding; calmodulin binding; actin binding; motor activity          | myosin filament; myofibril     | metabolic process                                                                                                              |  |

|                                          |                              |                                                                      |                            |                                              |  |
|------------------------------------------|------------------------------|----------------------------------------------------------------------|----------------------------|----------------------------------------------|--|
| CGI_10001653                             | paramyosin-like isoform X1   | motor activity                                                       | myosin filament; myofibril | metabolic process                            |  |
| CGI_10006807                             | Sarcoplasmic calcium-binding | calcium ion binding                                                  |                            |                                              |  |
| CGI_10024999                             | tubulin alpha-1A chain-like  | GTP binding; GTPase activity; structural constituent of cytoskeleton | cytoplasm; microtubule     | metabolic process; microtubule-based process |  |
| CGI_10012330, CGI_10010163, CGI_10019835 | tubulin beta chain           | GTP binding; GTPase activity; structural constituent of cytoskeleton | cytoplasm; microtubule     | metabolic process; microtubule-based process |  |
| CGI_10028694                             | Transketolase 2              | transketolase activity; metal ion binding                            |                            | metabolic process                            |  |
| CGI_10013163                             | tropomyosin isoform X6       |                                                                      |                            |                                              |  |
| CGI_10025556                             | Aldolase                     | fructose-bisphosphate aldolase activity                              |                            | glycolytic process                           |  |

|              |                                                     |                                                                                                   |                                                               |                                                                                                                                                                                                                |  |
|--------------|-----------------------------------------------------|---------------------------------------------------------------------------------------------------|---------------------------------------------------------------|----------------------------------------------------------------------------------------------------------------------------------------------------------------------------------------------------------------|--|
| CGI_10013347 | ATP synthase subunit mitochondrial                  | ATP binding; proton-transporting ATP synthase activity, rotational mechanism                      | proton-transporting ATP synthase complex, catalytic core F(1) | ATP hydrolysis coupled proton transport; ATP synthesis coupled proton transport                                                                                                                                |  |
| CGI_10019801 | Fructose-bisphosphate aldolase                      | fructose-bisphosphate aldolase activity                                                           |                                                               | glycolytic process                                                                                                                                                                                             |  |
| CGI_10014916 | phosphoenolpyruvate carboxykinase [GTP]-like        | GTP binding; phosphoenolpyruvate carboxykinase (GTP) activity; metal ion binding; kinase activity | mitochondrion                                                 | gluconeogenesis; phosphorylation                                                                                                                                                                               |  |
| CGI_10012474 | elongation factor 1-alpha                           | GTP binding; translation elongation factor activity; GTPase activity                              | cytoplasm; integral component of membrane                     | translational elongation                                                                                                                                                                                       |  |
| CGI_10001407 | elongation factor 2                                 | GTP binding; translation elongation factor activity; GTPase activity                              | cytoplasm; nematode larval development                        | hermaphrodite genitalia development; nematode larval development; oogenesis; determination of adult lifespan; embryo development ending in birth or egg hatching; apoptotic process; translational elongation; |  |
| CGI_10028469 | heterogeneous nuclear ribonucleo A1-like isoform X1 | nucleotide binding; nucleic acid binding                                                          | intracellular ribonucleoprotein complex; viral nucleocapsid   |                                                                                                                                                                                                                |  |
| CGI_10020922 | heterogeneous nuclear ribonucleo D-like isoform X2  | nucleotide binding; nucleic acid binding                                                          | intracellular ribonucleoprotein complex; viral nucleocapsid   |                                                                                                                                                                                                                |  |

|              |                                                  |                                                                                                   |                                                                                            |                                                                                                                                                                                                                          |                                                                                      |
|--------------|--------------------------------------------------|---------------------------------------------------------------------------------------------------|--------------------------------------------------------------------------------------------|--------------------------------------------------------------------------------------------------------------------------------------------------------------------------------------------------------------------------|--------------------------------------------------------------------------------------|
| CGI_10017621 | heat shock 90                                    | ATP binding;<br>unfolded protein binding                                                          |                                                                                            | protein folding;<br>response to stress                                                                                                                                                                                   | 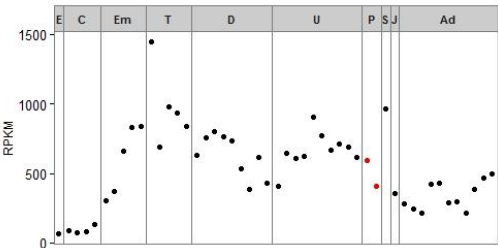   |
| CGI_10008056 | histone H4-partial                               | protein domain specific binding;<br>poly(A) RNA binding; DNA binding;<br>histone binding; protein | nucleosome;<br>nuclear chromosome, telomeric region;<br>nucleoplasm; extracellular exosome | positive regulation of gene expression, epigenetic; cellular protein metabolic process; DNA-templated transcription, initiation;<br>negative regulation of megakaryocyte differentiation; double-strand break repair via |    |
| CGI_10028871 | Plasminogen activator inhibitor 1 RNA-binding    | mRNA 3'-UTR binding                                                                               |                                                                                            |                                                                                                                                                                                                                          |    |
| CGI_10001493 | 40S ribosomal S24 isoform X1                     | nucleotide binding;<br>structural constituent of ribosome                                         | cytosolic small ribosomal subunit                                                          | maturation of SSU-rRNA from tricistronic rRNA transcript (SSU-rRNA, 5.8S rRNA, LSU-rRNA); primitive hemopoiesis; translation; definitive hemopoiesis                                                                     |  |
| CGI_10027192 | 60S ribosomal L5                                 | structural constituent of ribosome; 5S rRNA binding                                               | cytosolic large ribosomal subunit                                                          | ribosomal large subunit assembly; translation                                                                                                                                                                            |  |
| CGI_10010682 | 60S acidic ribosomal P0                          | structural constituent of ribosome; large ribosomal subunit rRNA binding                          | cytosolic large ribosomal subunit; preribosome, large subunit precursor                    | chordate embryonic development; cytoplasmic translation; ribosome biogenesis                                                                                                                                             |  |
| CGI_10026535 | staphylococcal nuclease domain-containing 1-like | GTP binding; transcription cofactor activity                                                      | membrane; RISC complex                                                                     | posttranscriptional gene silencing by RNA; small GTPase mediated signal transduction; regulation of nucleic acid-templated transcription                                                                                 |  |

|              |                                          |                                                                                                       |                                                                                                            |                                                                                                                                                                                                  |  |
|--------------|------------------------------------------|-------------------------------------------------------------------------------------------------------|------------------------------------------------------------------------------------------------------------|--------------------------------------------------------------------------------------------------------------------------------------------------------------------------------------------------|--|
| CGI_10024981 | mammalian ependymin-related 1-like       | calcium ion binding                                                                                   | extracellular exosome                                                                                      | cell-matrix adhesion                                                                                                                                                                             |  |
| CGI_10021481 | Arginine kinase                          | ATP binding; kinase activity                                                                          |                                                                                                            | phosphorylation                                                                                                                                                                                  |  |
| CGI_10026048 | disulfide isomerase                      | dioxygenase activity; protein disulfide isomerase activity; protein disulfide oxidoreductase activity | endoplasmic reticulum                                                                                      | cell redox homeostasis; oxidation-reduction process; protein folding                                                                                                                             |  |
| CGI_10011652 | disulfide-isomerase A3                   | protein disulfide isomerase activity                                                                  | endoplasmic reticulum                                                                                      | metabolic process; cell redox homeostasis; protein folding                                                                                                                                       |  |
| CGI_10025180 | peptidyl-prolyl cis-trans isomerase-like | peptidyl-prolyl cis-trans isomerase activity; chemoattractant activity; chemokine activity            |                                                                                                            | response to hypoxia; positive chemotaxis; positive regulation of macrophage chemotaxis; protein peptidyl-prolyl isomerization; protein folding; cell chemotaxis                                  |  |
| CGI_10015492 | 78 kDa glucose-regulated                 | ATP binding                                                                                           | endoplasmic reticulum lumen                                                                                |                                                                                                                                                                                                  |  |
| CGI_10024268 | 14-3-3 epsilon                           | protein domain specific binding; protein kinase C inhibitor activity; protein heterodimeri            | chromosome; microtubule associated complex; plasma membrane; nucleoplasm; centrosome; germline ring canal; | mitotic G2 DNA damage checkpoint; positive regulation of growth; pole cell migration; regulation of mitotic nuclear division; germline-derived oocyte fate determination; determination of adult |  |



|              |                                                 |                                 |  |  |  |
|--------------|-------------------------------------------------|---------------------------------|--|--|--|
| CGI_10014966 | 14-3-3 zeta isoform X1                          | protein domain specific binding |  |  |  |
| CGI_10007887 | PREDICTED: uncharacterized protein LOC105327706 |                                 |  |  |  |

Supplementary Note 2. Protein sequence of the “PREDICTED: uncharacterized protein LOC105327706” detected in the proteomic analysis, Gene ID: CGI\_10007887.

```
>gi|762088587|ref|XP_011426616.1| PREDICTED: uncharacterized protein
LOC105327706 [Crassostrea gigas]
MERLVYSVFFLTVCFLISDSSCLDMAAKKFSLFKSRQSFNNFKKRSFSGDNLNVGGKPQVKRQDPPPPPP
PPAVDLWALLGTSRENFIIEEHEEGLTTDVMTDIKKQMRDNLNDVKNI AELWARAISCHIFDAMTQAKRTT
GDTDPGIEEEIEEFEEEEKDL EELLASFDIDENNLEELVKGLPLPGIVLQCQESPLIMRTGDDTVDKLQ
TLAICGRFLMVKTVEAVDQHDVDTVDFVDFERYMKGALTFIHMI FLAVEEPDNPVREFTRLLENK
LHELKRYLQSAIAGIKHRK
```
